# Supplementary material for: Evidence for the occurrence of two sympatric sibling species within the Anopheles (Kerteszia) cruzii complex in southeast Brazil and the detection of asymmetric introgression between them using a multilocus analysis
Source: PubMed Central journal article supplement (PMC3850420; doi:10.1186/1471-2148-13-207), 2013-09-24
Supplement: 1471-2148-13-207-S1.pdf [file 1471-2148-13-207-S1.pdf]

| <i>locus</i>    | NR blocks | Removed sequences                                                              |
|-----------------|-----------|--------------------------------------------------------------------------------|
| <i>timeless</i> | 236 – 361 | Flo30a, Flo30b, Flo31a, Flo34a, Flo34b, Ita01a                                 |
| <i>Clock</i>    | 035 – 195 | Ita05b, Ita06b, Ita09a                                                         |
| <i>cycle</i>    | 061 – 131 | Flo06a, Flo09b, Ita04b, Ita07a, Ita08a, Ita09b, Ita12a, Ita12b                 |
| <i>Rp49</i>     | 049 – 269 | Flo06a, Flo06b, Flo09b, Flo12b, Ita05b                                         |
| <i>RpS2</i>     | 001 – 214 | Flo03b, Flo09b, Flo11b, Ita13b                                                 |
| <i>RpS29</i>    | 052 – 191 | Flo09b, Flo12a, Ita04a, Ita05a, Ita06a, Ita06b, Ita07a, Ita08b, Ita13a, Ita13b |
