# Supplementary material for: Evidence for the occurrence of two sympatric sibling species within the Anopheles (Kerteszia) cruzii complex in southeast Brazil and the detection of asymmetric introgression between them using a multilocus analysis
Source: PubMed Central journal article supplement (PMC3850420; doi:10.1186/1471-2148-13-207), 2013-09-24
Supplement: 1471-2148-13-207-S2.pdf [file 1471-2148-13-207-S2.pdf]

| <i>Locus</i>           | Population    | <i>RM</i> | <i>Length (bp)</i> | <i>n</i> | <i>S</i> | $\theta$        | $\pi$           | $D_T$             | $D_{FL}$          | $F_{FL}$           |
|------------------------|---------------|-----------|--------------------|----------|----------|-----------------|-----------------|-------------------|-------------------|--------------------|
| <b><i>timeless</i></b> | Florianópolis | 13        | 414 (126)          | 24 (19)  | 59 (21)  | 0.0411 (0.0449) | 0.0308 (0.0306) | -0.9832 (-1.1685) | -0.5497 (-0.8613) | -0.8051 (-1.1169)  |
|                        | Itatiaia      |           |                    | 24 (23)  | 29 (05)  | 0.0198 (0.0112) | 0.0189 (0.0083) | -0.1858 (-0.7414) | -0.5269 (-1.3380) | -0.4935 (-1.3515)  |
|                        | Itatiaia A    |           |                    | 12 (12)  | 10 (05)  | 0.0081 (0.0095) | 0.0111 (0.0120) | 1.5331 (1.0364)   | 1.0363 (0.5626)   | 1.3229 (0.7739)    |
|                        | Itatiaia B    |           |                    | 08 (08)  | 17 (04)  | 0.0168 (0.0086) | 0.0171 (0.0065) | 0.0697 (-1.0297)  | 0.1856 (-0.9208)  | 0.1763 (-1.0399)   |
| <b><i>Clock</i></b>    | Florianópolis | 02        | 195 (161)          | 24 (24)  | 10 (10)  | 0.0171 (0.0217) | 0.0177 (0.0225) | 0.1124 (0.1124)   | -0.6073 (-0.6073) | -0.4584 (-0.4584)  |
|                        | Itatiaia      |           |                    | 24 (21)  | 15 (14)  | 0.0341 (0.0419) | 0.0250 (0.0311) | -0.9617 (-0.9283) | 0.6915 (0.6362)   | 0.2194 (0.1874)    |
|                        | Itatiaia A    |           |                    | 12 (12)  | 07 (07)  | 0.0157 (0.0157) | 0.0128 (0.0128) | -0.6647 (-0.6647) | -0.2517 (-0.2517) | -0.4057 (-0.4057)  |
|                        | Itatiaia B    |           |                    | 08 (07)  | 13 (14)  | 0.0405 (0.0462) | 0.0400 (0.0428) | 0.1584 (-0.4094)  | -0.3159 (0.0189)  | -0.4265 (-0.0849)  |
| <b><i>cycle</i></b>    | Florianópolis | 08        | 218 (71)           | 24 (22)  | 21 (12)  | 0.0270 (0.0490) | 0.0280 (0.0377) | 0.1357 (-0.8009)  | 0.5674 (-0.1505)  | 0.5089 (-0.4032)   |
|                        | Itatiaia      |           |                    | 24 (18)  | 18 (08)  | 0.0233 (0.0301) | 0.0231 (0.0297) | -0.0317 (-0.0503) | -0.2068 (0.1404)  | -0.1794 (0.0981)   |
|                        | Itatiaia A    |           |                    | 12 (11)  | 10 (05)  | 0.0154 (0.0134) | 0.0187 (0.0163) | 0.9496 (0.9022)   | 0.2429 (0.5974)   | 0.4833 (0.7594)    |
|                        | Itatiaia B    |           |                    | 08 (08)  | 12 (09)  | 0.0217 (0.0277) | 0.0235 (0.0312) | 0.5596 (0.7968)   | 0.6619 (0.7366)   | 0.7078 (0.8311)    |
| <b><i>Rp49</i></b>     | Florianópolis | 02        | 271 (221)          | 24 (20)  | 10 (09)  | 0.0111 (0.0123) | 0.0084 (0.0089) | -0.8207 (-0.9168) | -0.4332 (-0.6073) | -0.6392 (-0.8139)  |
|                        | Itatiaia      |           |                    | 22 (21)  | 16 (12)  | 0.0163 (0.0149) | 0.0150 (0.0107) | -0.2790 (-0.9741) | 0.5352 (0.1902)   | 0.3410 (-0.1775)   |
|                        | Itatiaia A    |           |                    | 10 (10)  | 05 (05)  | 0.0066 (0.0066) | 0.0074 (0.0074) | 0.5276 (0.5276)   | -0.0239 (-0.0239) | 0.1245 (0.1245)    |
|                        | Itatiaia B    |           |                    | 08 (07)  | 08 (08)  | 0.0116 (0.0121) | 0.0134 (0.0127) | 0.8177 (0.2626)   | 1.0497 (0.3218)   | 1.1015 (0.3374)    |
| <b><i>RpS2</i></b>     | Florianópolis | 02        | 267 (214)          | 24 (21)  | 17 (14)  | 0.0183 (0.0187) | 0.0172 (0.0168) | -0.2287 (-0.3654) | 0.9497 (0.7993)   | 0.6908 (0.5223)    |
|                        | Itatiaia      |           |                    | 24 (23)  | 14 (11)  | 0.0140 (0.0137) | 0.0126 (0.0126) | -0.3410 (-0.2749) | 0.7378 (0.5022)   | 0.4817 (0.3152)    |
|                        | Itatiaia A    |           |                    | 12 (12)  | 09 (08)  | 0.0113 (0.0123) | 0.0116 (0.0126) | 0.1713 (0.0721)   | 0.1089 (-0.0526)  | 0.1419 (-0.0233)   |
|                        | Itatiaia B    |           |                    | 08 (08)  | 04 (03)  | 0.0058 (0.0054) | 0.0049 (0.0035) | -0.6257 (-1.4475) | -0.9208 (-1.5653) | -0.9372 (-1.6858)  |
| <b><i>RpS29</i></b>    | Florianópolis | 03        | 274 (140)          | 24 (22)  | 13 (11)  | 0.0135 (0.0239) | 0.0090 (0.0140) | -1.1475 (-1.4039) | -2.1989 (-2.3043) | -2.1961 (-2.3716)  |
|                        | Itatiaia      |           |                    | 24 (16)  | 25 (16)  | 0.0257 (0.0340) | 0.0210 (0.0251) | -0.6798 (-0.9320) | -0.9492 (-1.2205) | -1.0138 (-1.32309) |
|                        | Itatiaia A    |           |                    | 12 (10)  | 12 (05)  | 0.0147 (0.0094) | 0.0160 (0.0122) | 0.4282 (1.2838)   | 0.1135 (-0.1537)  | 0.2217 (-0.1104)   |
|                        | Itatiaia B    |           |                    | 08 (08)  | 15 (12)  | 0.0228 (0.0269) | 0.0185 (0.0213) | -0.8523 (-0.9158) | -1.0337 (-1.0729) | -1.1013 (-1.1496)  |
