# Supplementary material for: Evidence for the occurrence of two sympatric sibling species within the Anopheles (Kerteszia) cruzii complex in southeast Brazil and the detection of asymmetric introgression between them using a multilocus analysis
Source: PubMed Central journal article supplement (PMC3850420; doi:10.1186/1471-2148-13-207), 2013-09-24

# Alignment of the DNA sequences from the *timeless* gene fragment from Florianópolis and Itatiaia.

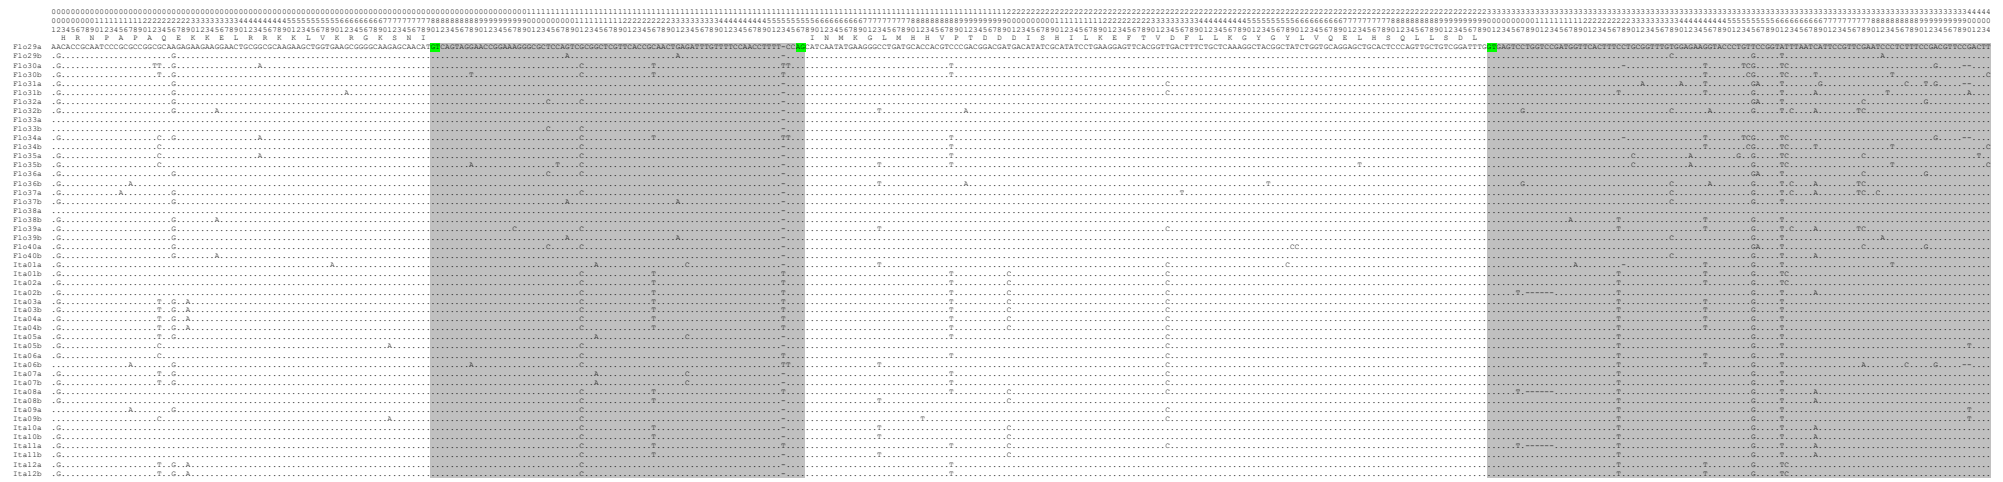

Supplement: 1471-2148-13-207-S3.pdf [file 1471-2148-13-207-S3.pdf]
