# Supplementary material for: Evidence for the occurrence of two sympatric sibling species within the Anopheles (Kerteszia) cruzii complex in southeast Brazil and the detection of asymmetric introgression between them using a multilocus analysis
Source: PubMed Central journal article supplement (PMC3850420; doi:10.1186/1471-2148-13-207), 2013-09-24
Supplement: 1471-2148-13-207-S4.pdf [file 1471-2148-13-207-S4.pdf]

|            |          | Minbin | Maxbin | HiPt   | HiSmth | Mean   | 95Lo   | 95Hi   | HPD90Lo | HPD90Hi |
|------------|----------|--------|--------|--------|--------|--------|--------|--------|---------|---------|
| $\theta_1$ | <b>A</b> | 1.2916 | 8.5312 | 3.2095 | 3.2699 | 3.3563 | 2.2592 | 4.9287 | 2.3110  | 4.4967  |
|            | <b>B</b> | 1.0324 | 8.6349 | 3.2613 | 3.2181 | 3.3563 | 2.2505 | 4.9287 | 2.2937  | 4.4881  |
|            | <b>C</b> | 1.0929 | 8.6263 | 3.2181 | 3.2095 | 3.3477 | 2.2419 | 4.9200 | 2.2937  | 4.4881  |
|            | <b>D</b> | 1.1274 | 8.6090 | 3.2008 | 3.1922 | 3.3477 | 2.2505 | 4.9200 | 2.2937  | 4.4794  |
| $\theta_2$ | <b>A</b> | 0.7779 | 6.4783 | 2.1300 | 2.1232 | 2.2795 | 1.4710 | 3.4956 | 1.4913  | 3.1355  |
|            | <b>B</b> | 0.6217 | 6.7908 | 2.2047 | 2.1843 | 2.2795 | 1.4710 | 3.4956 | 1.4981  | 3.1423  |
|            | <b>C</b> | 0.6013 | 6.7840 | 2.1775 | 2.1708 | 2.2795 | 1.4710 | 3.4956 | 1.4981  | 3.1423  |
|            | <b>D</b> | 0.6488 | 6.7772 | 2.1640 | 2.1572 | 2.2795 | 1.4710 | 3.5024 | 1.4913  | 3.1355  |
| $\theta_A$ | <b>A</b> | 0.0043 | 8.6349 | 0.7473 | 0.7041 | 0.8510 | 0.0475 | 2.7257 | 0.0043  | 1.8877  |
|            | <b>B</b> | 0.0043 | 8.6349 | 0.6782 | 0.6609 | 0.8423 | 0.0475 | 2.7170 | 0.0043  | 1.8790  |
|            | <b>C</b> | 0.0043 | 8.6349 | 0.0043 | 0.0043 | 0.8423 | 0.0475 | 2.7170 | 0.0043  | 1.8704  |
|            | <b>D</b> | 0.0043 | 8.6349 | 0.6523 | 0.6436 | 0.8510 | 0.0475 | 2.7343 | 0.0043  | 1.8877  |
| $t$        | <b>A</b> | 0.5740 | 3.9980 | 1.4740 | 1.5020 | 1.5900 | 1.0180 | 2.3980 | 1.0420  | 2.1660  |
|            | <b>B</b> | 0.4500 | 3.9980 | 1.5260 | 1.5500 | 1.5980 | 1.0260 | 2.4100 | 1.0500  | 2.1820  |
|            | <b>C</b> | 0.3700 | 3.9980 | 1.5380 | 1.5340 | 1.6020 | 1.0260 | 2.4140 | 1.0500  | 2.1780  |
|            | <b>D</b> | 0.5020 | 3.9980 | 1.5060 | 1.5260 | 1.5940 | 1.0220 | 2.4100 | 1.0460  | 2.1780  |
| $m_1$      | <b>A</b> | 0.0010 | 1.1630 | 0.0430 | 0.0470 | 0.0830 | 0.0110 | 0.3010 | 0.0030  | 0.2030  |
|            | <b>B</b> | 0.0010 | 1.4170 | 0.0490 | 0.0470 | 0.0870 | 0.0110 | 0.3090 | 0.0030  | 0.2110  |
|            | <b>C</b> | 0.0010 | 1.3030 | 0.0470 | 0.0470 | 0.0870 | 0.0110 | 0.3110 | 0.0030  | 0.2110  |
|            | <b>D</b> | 0.0010 | 1.2710 | 0.0470 | 0.0470 | 0.0870 | 0.0110 | 0.3110 | 0.0030  | 0.2110  |
| $m_2$      | <b>A</b> | 0.0010 | 0.9210 | 0.0350 | 0.0330 | 0.0690 | 0.0050 | 0.2650 | 0.0010  | 0.1770  |
|            | <b>B</b> | 0.0010 | 1.3630 | 0.0310 | 0.0330 | 0.0670 | 0.0050 | 0.2630 | 0.0010  | 0.1730  |
|            | <b>C</b> | 0.0010 | 1.6010 | 0.0330 | 0.0330 | 0.0670 | 0.0050 | 0.2630 | 0.0010  | 0.1730  |
|            | <b>D</b> | 0.0010 | 1.1210 | 0.0310 | 0.0310 | 0.0670 | 0.0050 | 0.2630 | 0.0010  | 0.1730  |
