# Supplementary material for: Evidence for the occurrence of two sympatric sibling species within the Anopheles (Kerteszia) cruzii complex in southeast Brazil and the detection of asymmetric introgression between them using a multilocus analysis
Source: PubMed Central journal article supplement (PMC3850420; doi:10.1186/1471-2148-13-207), 2013-09-24
Supplement: 1471-2148-13-207-S5.pdf [file 1471-2148-13-207-S5.pdf]

|            |          | Minbin | Maxbin  | HiPt   | HiSmth | Mean   | 95Lo   | 95Hi   | HPD90Lo | HPD90Hi |
|------------|----------|--------|---------|--------|--------|--------|--------|--------|---------|---------|
| $\theta_1$ | <b>A</b> | 0.0557 | 4.1738  | 0.7394 | 0.6917 | 0.7394 | 0.2306 | 1.5026 | 0.1988  | 1.2482  |
|            | <b>B</b> | 0.0398 | 4.5872  | 0.6917 | 0.7076 | 0.7394 | 0.2306 | 1.5026 | 0.1988  | 1.2482  |
|            | <b>C</b> | 0.0557 | 4.1102  | 0.7076 | 0.6917 | 0.7235 | 0.2306 | 1.5026 | 0.1988  | 1.2482  |
|            | <b>D</b> | 0.0398 | 6.6701  | 0.7076 | 0.6917 | 0.7394 | 0.2306 | 1.5026 | 0.1988  | 1.2482  |
| $\theta_2$ | <b>A</b> | 0.1095 | 24.3182 | 1.3017 | 1.2530 | 1.5450 | 0.6204 | 4.7323 | 0.4501  | 3.0048  |
|            | <b>B</b> | 0.1095 | 24.3182 | 1.2530 | 1.2530 | 1.5450 | 0.6204 | 4.6106 | 0.4501  | 2.9805  |
|            | <b>C</b> | 0.1581 | 24.3182 | 1.3260 | 1.2530 | 1.5450 | 0.6204 | 4.6593 | 0.4501  | 3.0048  |
|            | <b>D</b> | 0.0852 | 24.3182 | 1.2287 | 1.2530 | 1.5450 | 0.6204 | 4.6349 | 0.4501  | 2.9805  |
| $m_1$      | <b>A</b> | 0.0050 | 9.9950  | 0.0050 | 0.0050 | 0.7750 | 0.0250 | 7.6150 | 0.0050  | 4.3950  |
|            | <b>B</b> | 0.0050 | 9.9950  | 0.0050 | 0.0050 | 0.7550 | 0.0150 | 7.5550 | 0.0050  | 4.2950  |
|            | <b>C</b> | 0.0050 | 9.9950  | 0.0050 | 0.0050 | 0.7950 | 0.0250 | 7.6350 | 0.0050  | 4.4450  |
|            | <b>D</b> | 0.0050 | 9.9950  | 0.0050 | 0.0050 | 0.7750 | 0.0250 | 7.6350 | 0.0050  | 4.4050  |
| $m_2$      | <b>A</b> | 0.0050 | 9.9950  | 2.2050 | 2.1950 | 2.4950 | 0.2950 | 6.2450 | 0.0050  | 4.5150  |
|            | <b>B</b> | 0.0050 | 9.9950  | 2.1950 | 2.2050 | 2.5050 | 0.3150 | 6.2450 | 0.0750  | 4.5850  |
|            | <b>C</b> | 0.0050 | 9.9950  | 2.2550 | 2.2450 | 2.4950 | 0.3050 | 6.2150 | 0.0750  | 4.5650  |
|            | <b>D</b> | 0.0050 | 9.9950  | 2.2350 | 2.2250 | 2.5050 | 0.2950 | 6.2350 | 0.0250  | 4.5350  |
