# Supplementary material for: Evidence for the occurrence of two sympatric sibling species within the Anopheles (Kerteszia) cruzii complex in southeast Brazil and the detection of asymmetric introgression between them using a multilocus analysis
Source: PubMed Central journal article supplement (PMC3850420; doi:10.1186/1471-2148-13-207), 2013-09-24
Supplement: 1471-2148-13-207-S6.pdf [file 1471-2148-13-207-S6.pdf]

**A**

|            |          | Minbin | Maxbin | HiPt   | HiSmth | Mean   | 95Lo   | 95Hi   | HPD90Lo | HPD90Hi |
|------------|----------|--------|--------|--------|--------|--------|--------|--------|---------|---------|
| $\theta_1$ | <b>A</b> | 1.1533 | 8.6003 | 3.2267 | 3.2181 | 3.3218 | 2.1987 | 4.9114 | 2.2505  | 4.4622  |
|            | <b>B</b> | 0.9460 | 8.6263 | 3.1749 | 3.1663 | 3.3131 | 2.1987 | 4.9114 | 2.2419  | 4.4622  |
|            | <b>C</b> | 1.0583 | 8.5917 | 3.1404 | 3.2008 | 3.3131 | 2.1987 | 4.9114 | 2.2419  | 4.4622  |
|            | <b>D</b> | 1.0151 | 8.6349 | 3.2181 | 3.2095 | 3.3218 | 2.1987 | 4.9114 | 2.2505  | 4.4708  |
| $\theta_2$ | <b>A</b> | 0.2274 | 4.2191 | 1.0394 | 1.0351 | 1.1031 | 0.6100 | 1.9491 | 0.6058  | 1.6728  |
|            | <b>B</b> | 0.1892 | 4.2488 | 1.0266 | 1.0181 | 1.1031 | 0.6100 | 1.9448 | 0.6015  | 1.6643  |
|            | <b>C</b> | 0.2104 | 4.2488 | 1.0309 | 1.0266 | 1.1031 | 0.6100 | 1.9448 | 0.6058  | 1.6685  |
|            | <b>D</b> | 0.1934 | 4.2488 | 1.0139 | 1.0096 | 1.1031 | 0.6100 | 1.9448 | 0.6058  | 1.6685  |
| $\theta_A$ | <b>A</b> | 0.0043 | 8.6349 | 0.8855 | 0.8769 | 1.1015 | 0.0734 | 3.5464 | 0.0043  | 2.3542  |
|            | <b>B</b> | 0.0043 | 8.6349 | 0.9114 | 0.9028 | 1.1015 | 0.0734 | 3.5464 | 0.0043  | 2.3628  |
|            | <b>C</b> | 0.0043 | 8.6349 | 0.8769 | 0.8769 | 1.1101 | 0.0734 | 3.5464 | 0.0043  | 2.3628  |
|            | <b>D</b> | 0.0043 | 8.6349 | 0.8596 | 0.9201 | 1.1015 | 0.0734 | 3.5291 | 0.0043  | 2.3542  |
| t          | <b>A</b> | 0.3500 | 3.9980 | 1.3700 | 1.3660 | 1.4540 | 0.8740 | 2.5460 | 0.8700  | 2.1100  |
|            | <b>B</b> | 0.3380 | 3.9980 | 1.3300 | 1.3540 | 1.4540 | 0.8780 | 2.5580 | 0.8700  | 2.1100  |
|            | <b>C</b> | 0.3980 | 3.9980 | 1.3500 | 1.3460 | 1.4500 | 0.8820 | 2.5500 | 0.8700  | 2.1020  |
|            | <b>D</b> | 0.3140 | 3.9980 | 1.3660 | 1.3620 | 1.4580 | 0.8780 | 2.5340 | 0.8740  | 2.1100  |
| $m_1$      | <b>A</b> | 0.0010 | 1.2290 | 0.0450 | 0.0450 | 0.0790 | 0.0110 | 0.2890 | 0.0030  | 0.1950  |
|            | <b>B</b> | 0.0010 | 1.5030 | 0.0470 | 0.0450 | 0.0790 | 0.0110 | 0.2930 | 0.0030  | 0.1950  |
|            | <b>C</b> | 0.0010 | 1.5670 | 0.0410 | 0.0450 | 0.0790 | 0.0090 | 0.2930 | 0.0030  | 0.1950  |
|            | <b>D</b> | 0.0010 | 1.3550 | 0.0470 | 0.0450 | 0.0790 | 0.0110 | 0.2910 | 0.0030  | 0.1950  |
| $m_2$      | <b>A</b> | 0.0010 | 1.9970 | 0.0010 | 0.0010 | 0.0670 | 0.0030 | 0.4150 | 0.0010  | 0.2410  |
|            | <b>B</b> | 0.0010 | 1.9990 | 0.0010 | 0.0010 | 0.0690 | 0.0030 | 0.4170 | 0.0010  | 0.2410  |
|            | <b>C</b> | 0.0010 | 1.9950 | 0.0010 | 0.0010 | 0.0690 | 0.0030 | 0.4170 | 0.0010  | 0.2410  |
|            | <b>D</b> | 0.0010 | 1.9990 | 0.0010 | 0.0010 | 0.0670 | 0.0030 | 0.4150 | 0.0010  | 0.2410  |

## B

|            |          | Minbin | Maxbin | HiPt   | HiSmth | Mean   | 95Lo   | 95Hi   | HPD90Lo | HPD90Hi |
|------------|----------|--------|--------|--------|--------|--------|--------|--------|---------|---------|
| $\theta_1$ | <b>A</b> | 1.1895 | 8.8523 | 3.3102 | 3.3013 | 3.4527 | 2.3033 | 5.0833 | 2.3568  | 4.6378  |
|            | <b>B</b> | 1.0737 | 8.9058 | 3.3458 | 3.3369 | 3.4616 | 2.3122 | 5.0922 | 2.3568  | 4.6378  |
|            | <b>C</b> | 1.1895 | 8.8523 | 3.2567 | 3.3547 | 3.4616 | 2.3122 | 5.0833 | 2.3568  | 4.6289  |
|            | <b>D</b> | 1.1361 | 8.9058 | 3.3458 | 3.3102 | 3.4616 | 2.3122 | 5.0922 | 2.3568  | 4.6378  |
| $\theta_2$ | <b>A</b> | 0.3221 | 7.0766 | 1.7453 | 1.7382 | 1.9293 | 1.0018 | 3.7419 | 0.9594  | 3.0834  |
|            | <b>B</b> | 0.2230 | 7.0766 | 1.7311 | 1.7240 | 1.9293 | 0.9948 | 3.7419 | 0.9594  | 3.0834  |
|            | <b>C</b> | 0.3292 | 7.0766 | 1.7169 | 1.6886 | 1.9364 | 1.0018 | 3.7348 | 0.9664  | 3.0905  |
|            | <b>D</b> | 0.2230 | 7.0766 | 1.6957 | 1.7453 | 1.9293 | 0.9948 | 3.7348 | 0.9594  | 3.0834  |
| $\theta_A$ | <b>A</b> | 0.0045 | 8.9058 | 0.0312 | 0.0401 | 0.7173 | 0.0312 | 2.8201 | 0.0045  | 1.8311  |
|            | <b>B</b> | 0.0045 | 8.9058 | 0.0045 | 0.0045 | 0.7173 | 0.0312 | 2.8201 | 0.0045  | 1.8400  |
|            | <b>C</b> | 0.0045 | 8.9058 | 0.0936 | 0.0846 | 0.7173 | 0.0401 | 2.8201 | 0.0045  | 1.8400  |
|            | <b>D</b> | 0.0045 | 8.9058 | 0.0045 | 0.0045 | 0.7173 | 0.0312 | 2.8201 | 0.0045  | 1.8400  |
| t          | <b>A</b> | 0.4780 | 3.9980 | 1.6180 | 1.6620 | 1.7060 | 1.0860 | 2.5980 | 1.1140  | 2.3140  |
|            | <b>B</b> | 0.4300 | 3.9980 | 1.6340 | 1.6660 | 1.7020 | 1.0780 | 2.5860 | 1.1100  | 2.3100  |
|            | <b>C</b> | 0.4100 | 3.9980 | 1.6980 | 1.6780 | 1.7020 | 1.0740 | 2.5780 | 1.1100  | 2.3100  |
|            | <b>D</b> | 0.3660 | 3.9980 | 1.6780 | 1.6740 | 1.7020 | 1.0780 | 2.5820 | 1.1100  | 2.3100  |
| $m_1$      | <b>A</b> | 0.0010 | 1.9830 | 0.0530 | 0.0510 | 0.0970 | 0.0110 | 0.3430 | 0.0010  | 0.2310  |
|            | <b>B</b> | 0.0010 | 1.6070 | 0.0530 | 0.0530 | 0.0950 | 0.0090 | 0.3370 | 0.0010  | 0.2270  |
|            | <b>C</b> | 0.0010 | 1.5530 | 0.0590 | 0.0570 | 0.0950 | 0.0110 | 0.3370 | 0.0010  | 0.2270  |
|            | <b>D</b> | 0.0010 | 1.7770 | 0.0530 | 0.0510 | 0.0950 | 0.0090 | 0.3370 | 0.0010  | 0.2270  |
| $m_2$      | <b>A</b> | 0.0010 | 1.9990 | 0.0470 | 0.0450 | 0.1530 | 0.0090 | 0.6690 | 0.0010  | 0.4290  |
|            | <b>B</b> | 0.0010 | 1.9990 | 0.0510 | 0.0490 | 0.1530 | 0.0090 | 0.6730 | 0.0010  | 0.4290  |
|            | <b>C</b> | 0.0010 | 1.9990 | 0.0470 | 0.0550 | 0.1530 | 0.0090 | 0.6650 | 0.0010  | 0.4250  |
|            | <b>D</b> | 0.0010 | 1.9990 | 0.0510 | 0.0530 | 0.1530 | 0.0090 | 0.6730 | 0.0010  | 0.4310  |
